# Supplementary material
Source: PubMed Central journal article supplement (PMC7006958)
Supplement: ac9b01010_si_001.pdf [file ac9b01010_si_001.pdf]

## Supporting Information

### Single-Cell and Time-Resolved Profiling of Intracellular *Salmonella* Metabolism in Primary Human Cells

*Jiabao Xu*<sup>1</sup>, *Lorena Preciado-Llanes*<sup>2,3,Γ</sup>, *Anna Aulicino*<sup>2,3,Γ</sup>, *Christoph Martin Decker*<sup>4</sup>, *Maren Depke*<sup>4</sup>, *Manuela Gesell Salazar*<sup>4</sup>, *Frank Schmidt*<sup>4,5</sup>, *Alison Simmons*<sup>2,3</sup> and *Wei E. Huang*<sup>1\*</sup>

1. Begbroke Science Park, Department of Engineering Science, University of Oxford, Woodstock Road, Oxford, OX5 1PF, United Kingdom.
2. MRC Human Immunology Unit, Weatherall Institute of Molecular Medicine, University of Oxford, Oxford OX3 9DS, UK
3. Translational Gastroenterology Unit, John Radcliffe Hospital, Headington, Oxford OX3 9DU, UK
4. Interfaculty Institute for Genetics and Functional Genomics, University Medicine Greifswald, Felix-Hausdorff-Str. 8, 17475 Greifswald, Germany
5. Proteomics Core, Weill Cornell Medicine-Qatar, Education City, PO 24144 Doha, Qatar

<sup>Γ</sup>L. P. and A. A. have contributed equally to this study.

\*Corresponding author: Wei E. Huang

[wei.huang@eng.ox.ac.uk](mailto:wei.huang@eng.ox.ac.uk)

Telephone: +44 (0)1865 283786, Fax: +44 (0)1865 3749

## Table of Contents

### Supporting Methods

**Table S1.** Details of LC-MS/MS analysis

**Table S2.** Biological and vibrational assignments of relevant Raman bands in *Salmonella* spectra

**Table S3.** Confusion matrix and performance evaluation of the kNN classification model classifying 116 STM-LT2 spectra, 152 STM-D23580 spectra and 125 ST-Ty2 spectra.

**Figure S1.** Loading plot of SCRS of STM-LT2, STM-D23580 and ST-Ty2, with Raman wavenumbers against their contributions to PC1 of the PCA.

**Figure S2.** SCRS of STM-LT2 and *E. coli* DH5 $\alpha$  (EC- DH5 $\alpha$ ). Bacterial cultures were grown overnight in LB broth in the presence of 35% D<sub>2</sub>O.

**Figure S3.** Number of recovered live *Salmonella*, expressed as CFU/mL during (A) extracellular growth of D-labelled bacteria in RPMI and intracellular growth of D-labelled bacteria in (B) THP-1, (C) Monocyte-derived Dendritic cell (MoDC) and (D) macrophages (Mf).

**Figure S4.** Complete Raman profiling.

**Figure S5.** t-SNE plots of SCRS of STM-LT2, STM-D23580 and ST-Ty2 at 2 hr p.i. of MoDCs and Mf

**Figure S6.** Venn diagram of proteins detected by LC-MS/MS proteomic analysis in STM-LT2, STM-D23580 and ST-Ty2 at time 0.75, 2, 4 and 6 hr post infection in human dendritic cells.

**Figure S7.** Dotplots of abundance of DEPs related to (A) energy and (B) biosynthesis pathways in STM-LT2 (green), STM-D23580 (blue) and ST-Ty2 (red).

**Figure S8.** Single-cell heatmap from Raman integrations of important biomolecules demonstrates serovar-specific heterogeneity during the course of infection of (A) THP-1, (B) MoDCs and (C) Mf.

### Supporting References

## Supporting Methods

**Bacterial strains and culture conditions.** The ability of *Salmonella* to incorporate D<sub>2</sub>O was tested by growing bacteria overnight in LB Lennox broth (Sigma, UK) supplemented with 35% D<sub>2</sub>O (v/v), at 37 °C under continuous shaking at 200 rpm. The degree of D<sub>2</sub>O incorporation by STM-LT2 was compared with EC-DH5 $\alpha$ , used as reference.

For the infection experiments, STM-LT2, STM-D23580 and ST-Ty2 were grown to logarithmic growth phase in LB Lennox broth (Sigma) supplemented with 10% sucrose (Sigma) and 50% D<sub>2</sub>O. Aliquots were kept frozen at –80 °C until use, whilst bacterial viability was monitored periodically. For each experiment, an aliquot of bacteria was thawed, washed and resuspended in RPMI 1640 (Sigma) to obtain a multiplicity of infection (MOI) of 30:1 (bacteria:THP-1), 15:1 (bacteria:macrophage) or 10:1 (bacteria:dendritic cell). As a control for bacterial extracellular growth, RPMI was inoculated with each strain at 37 °C under continuous shaking at 200 rpm. At specific time points, corresponding to the kinetic of the infection, bacteria were collected, washed and processed for the single-cell Raman spectra (SCRS) measurements and analysis, as described below. The number of microorganisms was assessed at each time point post infection (p.i.) by plating 10-fold dilutions of the bacterial suspension, in quadruplicate, on LB Lennox agar (Sigma). The number of bacteria was determined as Colony Forming Units (CFU).

**Propagation of THP-1 cells and infection.** THP-1 cells were obtained from the American Type Culture Collection (ATCC, TIB-202). The cells were maintained in vented T75 flasks (Cellstar) at 37 °C, 5% CO<sub>2</sub> and split every 2-3 days when confluent ( $2 \times 10^6$  cells/mL). One day before the infection, THP-1 cells were harvested, washed, resuspended at a density of  $1 \times 10^6$  cells/mL/well in 24-well plates (Costar) in complete RPMI medium containing 10% Fetal Bovine Serum (FBS, Sigma), 2 mM L-Glutamine, 100 U/mL of penicillin and 100  $\mu$ g/mL streptomycin (Sigma), and supplemented with 25 ng/mL of phorbol 12-myristate 13-acetate (PMA, Sigma) to induce differentiation into macrophage-like cells, while incubating at 37 °C, 5% CO<sub>2</sub> for 24h.

**Generation of monocyte-derived dendritic cells and macrophages and infection.** Leukocyte Reduction System cones were obtained from the UK National Blood Centre with informed consent following local ethical guidelines. Blood from healthy donors was diluted in PBS and layered on a standard density gradient (Lymphoprep<sup>TM</sup>). Peripheral Blood Mononuclear Cells (PBMC) were collected from the interface and washed three times in PBS at 4 °C. Monocytes were obtained by magnetic isolation using human CD14<sup>+</sup> MicroBeads (Miltenyi Biotec, Germany) according to manufacturer's protocol. Monocyte-derived dendritic cells (MoDCs) and macrophages (Mf) were obtained by incubation of freshly isolated monocytes in complete

medium in the presence of 40 ng/mL of recombinant human (rh) Granulocyte Macrophage-Colony-Stimulating Factor (GM-CSF) plus 40 ng/mL rh Interleukin-4 (IL-4) or 100 ng/mL of rh Macrophage-Colony-Stimulating Factor (M-CSF) (Peprotech), respectively, at 37 °C in humidified atmosphere at 5% CO<sub>2</sub>.

Cells differentiating into MoDCs were plated in tissue culture dishes (Falcon) at a density of 1 x10<sup>6</sup> cells/mL, while cells differentiating into Mf were plated in 24 well plate (Costar) at a density of 5 x10<sup>5</sup> cells/mL. After 5 days of culture, MoDCs were harvested, washed in PBS, resuspended in complete medium without antibiotics and seeded in polypropylene tubes (Falcon) at a density of 1 x10<sup>6</sup> cells/tube.

After 6 days of culture, Mf were washed with PBS and 500 µL of complete medium without antibiotics was added to each well.

**Single-cell Raman spectra (SCRS) measurements and analysis.** At specific time point p.i., bacteria grown in RPMI and cell lysates of THP-1, MoDCs and Mf were washed with PBS, fixed in 4% paraformaldehyde/PBS (PFA, EMS) (v/v) at RT for 15 min and washed twice with Milli-Q water. Samples were then diluted and spotted onto a Raman slide. Individual cells were observed under a 100×/0.8 microscope objective. SCRS were acquired using an HR Evolution confocal Raman microscope (Horiba Jobin-Yvon, France) equipped with a 532 nm neodymium-yttrium aluminum garnet laser. The laser power was attenuated to 4.7 mW by neutral density (ND) filters. Raman scattering was detected by a charge coupled device (CCD) cooled at -68°C. The spectra were acquired in the range of 500 to 3500 cm<sup>-1</sup> with a 300 grooves/mm diffraction grating. The acquisition time was 10 s per spectrum and at least 30 single bacterial cells were acquired per each condition.

**Raman data pre-processing and analysis.** Bands associated with Carbohydrates I (382 – 470 cm<sup>-1</sup>), Carbohydrates II (510 – 600 cm<sup>-1</sup>), Adenine (705 – 736 cm<sup>-1</sup>), DNA/RNA (765 – 795 cm<sup>-1</sup>), Tyrosine (843 – 869 cm<sup>-1</sup>), Phenylalanine (985 – 1015 cm<sup>-1</sup>), Carbohydrates III (1020 – 1070 cm<sup>-1</sup>), Amide III (1208 – 1275 cm<sup>-1</sup>), Lipid I (1275 – 1357 cm<sup>-1</sup>), Lipid II (1425 – 1470 cm<sup>-1</sup>), Amide I (1630 – 1710 cm<sup>-1</sup>), saturated C-H (2880 – 2950 cm<sup>-1</sup>) and unsaturated C-H (2990 – 3015 cm<sup>-1</sup>) were integrated to quantify intracellular biomolecule concentration. The C-D (2070 - 2300 cm<sup>-1</sup>) and C-H (2800-3030 cm<sup>-1</sup>) band areas were calculated to determine deuterium content originating from incubation with D<sub>2</sub>O.

**LC-MS/MS measurements and analysis.** At specific time points p.i., MoDCs were lysed by addition of 500 µL of saponin 2% (w/v) in PBS followed by 5 min incubation at 37°C, and bacterial pellets were resuspended in 20 mM ammonium bicarbonate (ABC; Sigma-Aldrich, St.

Louis, MO, USA). Cell solution was then supplemented with 50% trifluoroacetic acid (TFA; Uvasol®, Merck, Darmstadt, Germany) to reach a final concentration of 1% TFA. After 15 min of incubation at 37 °C pH was adjusted to pH 7.0 using 0.5 M ABC. Sequencing grade modified trypsin (0.3 µg; Promega, Madison, WI, USA) was added and incubated for 16 h at 37 °C. Tryptic digestion was stopped by acetic acid (RotiPuran®; Carl Roth GmbH + Co. KG, Karlsruhe, Germany) at a final concentration of 1%. The suspension was centrifuged at 13,000 g for 10 min at 4 °C. Supernatant was collected and purified using ZipTip C18 (Millipore, Schwalbach, Germany). Purified tryptic peptides were dried by lyophilization, dissolved in Buffer A consisting of 2% acetonitrile (J.T. Baker®; part of Fisher Scientific, Waltham, MA, USA), 0.1% acetic acid (Roth) in water (J.T. Baker®), and subjected to LC-MS/MS analysis. Two biological and three technical replicates were performed.

Due to the high pathogenicity of *Salmonella typhi*, we optimized the way to safely kill all bacteria in BSL3 area in order to continue with the peptide preparation outside. Previous studies have shown a strong lytic effect of low pH conditions on gram negative bacteria and kills them rigorous<sup>1,2</sup>. Tests with *Salmonella typhi* incubated with 1% trifluoroacetic acid for 15 min didn't show any further bacterial growth and after neutralization, trypsin was efficiently working. Also *Escherichia coli* was treated under identical conditions using a low number of bacteria and was analyzed in mass spectrometry. Using this method, we could identify a sufficient number of proteins and we did not find any significant peptide modifications caused by the use of trifluoroacetic acid.

Due to the neutralization with ABC after 1% trifluoroacetic acid treatment, the volume already increased and a further add of additional compounds would lead to very high volumes. Additional precipitation steps would be necessary and would yield to a loss of proteins/peptides. In addition, any use of e.g. urea leads to unspecific artificial modification on a various number of peptides<sup>1,2</sup>. This leads to a split of the primary peptide intensity into more variances with lower intensities and further to less identifications, because only a limited number of bacteria and proteins/peptides were available. We therefore tried to limit the chemical treatments to a minimum.

Raw data files from the LC-MS/MS runs were analyzed using MaxQuant version 1.5.3.8. Analysis was performed in strain-specific batches (10 files each for STM-D23580 and ST-Ty2, 9 files for STM-LT2). In all MaxQuant analyses, parameters were set to specific Trypsin/P digestion with maximal 2 missed cleavages. Oxidation of methionine, oxidation of cysteine, deamidation of asparagine, and N-terminal acetylation were chosen as variable modifications with at most 5 modifications allowed per peptide. Fixed modifications were not set. The peptide

mass was limited to 9,900 Da. Label-free quantification (LFQ) with an LFQ minimal ratio count of 2 was selected. Protein identification was supported by alignment between the samples of each analysis batch using the “match between runs” feature with a match time window of 0.7 min and an alignment time window of 20 min. The false discovery rate (FDR) was controlled using a target-decoy approach and limited to 1%. Quantification was performed on normalized data and a minimal ratio count of 2, with unique and razor peptides, including unmodified as well as modified peptides. Other parameters were set to default values. Resulting data of protein identifications were filtered prior to analysis of biological content. Contaminants, false-positive (reverse) hits and protein groups containing more than single proteins were removed. The following analysis was done under an R environment. Log<sub>2</sub> transformed label-free quantification (LFQ) intensities were calculated and pairwise comparisons of p.i. 0.75 hr, 2 hr, 4 hr and 6 hr (6 pairs in total) were done using empirical Bayes approach in LIMMA package. Proteins with  $p < 0.05$  (moderated t-test) at any pairwise comparison were determined as differentially expressed proteins (DEPs). DEPs were then functionally annotated using Biocyc database.

## Supporting Tables

**Table S1.** Details of LC-MS/MS analysis

| <b>Reversed Phase Liquid Chromatography (RPLC)</b> |                                                                                                                                     |
|----------------------------------------------------|-------------------------------------------------------------------------------------------------------------------------------------|
| instrument                                         | Ultimate 3000 RSLC (Dionex, Idstein, Germany)                                                                                       |
| trap column                                        | 75 $\mu\text{m}$ inner diameter, packed with 3 $\mu\text{m}$ C18 particles (Acclaim PepMap100, Thermo Scientific)                   |
| analytical column                                  | Accucore 150-C18: 25 cm x 75 $\mu\text{m}$ , 2.6 $\mu\text{m}$ C18 particles, 150 $\text{\AA}$ pore size (Thermo Fisher Scientific) |
| buffer system                                      | binary buffer system consisting of 0.1% acetic acid, 2% ACN (buffer A) and 0.1% acetic acid in 100% ACN in (buffer B)               |
| flow rate                                          | 300 nl/min                                                                                                                          |
| gradient                                           | linear gradient of buffer B from 2% up to 25%                                                                                       |
| gradient duration                                  | 60 min of linear gradient, total gradient time 95 min                                                                               |
| gradient time and percentage of Buffer B           | 0 min – 2%, 2 min – 5%, 10 min – 5%, 70 min – 25%, 75 min – 40%, 77 min – 90%, 82 min – 90%, 85 min – 2%, 95 min – 2%               |
| column oven temperature                            | 40 $^{\circ}\text{C}$                                                                                                               |
| <b>Mass Spectrometry (MS)</b>                      |                                                                                                                                     |
| instrument                                         | Q Exactive plus mass spectrometer (Thermo Scientific)                                                                               |
| electrospray                                       | Nanospray Flex Ion Source (Thermo Scientific)                                                                                       |
| operation mode                                     | data-dependent                                                                                                                      |
| MS scan resolution                                 | 70,000                                                                                                                              |
| MS ion target value                                | 3E6                                                                                                                                 |
| Scan range                                         | 300-1650 m/z                                                                                                                        |
| maximum ion injection time for the MS scan         | 120 ms                                                                                                                              |
| MS spectra data type                               | profile                                                                                                                             |
| selection for MS/MS                                | 10 most abundant isotope patterns with charge $\geq 2$ from survey scan                                                             |
| MS/MS resolution                                   | 17,500                                                                                                                              |
| MS/MS ion target value                             | 2E5                                                                                                                                 |
| maximum ion injection time for the MS/MS scans     | 120 ms                                                                                                                              |
| MS/MS spectra data type                            | centroid                                                                                                                            |
| isolation window                                   | 3 m/z                                                                                                                               |
| dissociation mode                                  | higher energy collisional dissociation (HCD)                                                                                        |
| normalized collision energy                        | 27.5%                                                                                                                               |
| peptide match                                      | preferred                                                                                                                           |
| charge exclusion                                   | 1, >6                                                                                                                               |

**Table S2.** Biological and vibrational assignments of relevant Raman bands in *Salmonella* spectra

| <b>Raman wavenumber centred at (cm<sup>-1</sup>)</b> | <b>Assignments</b>    | <b>Vibrational mode</b>               | <b>Reference</b> |
|------------------------------------------------------|-----------------------|---------------------------------------|------------------|
| 410                                                  | Carbohydrates I       | skeletal mode of carbohydrates        | 3                |
| 545                                                  | Carbohydrates II      | C-O-C glycosidic ring deformation     | 4                |
| 722                                                  | Adenine               | Ring breathing                        | 5                |
| 780                                                  | DNA/RNA               | Cytosine, uracil ring breathing       | 6                |
| 853                                                  | Tyrosine              | Ring breathing                        | 5                |
| 1003                                                 | Phenylalanine         | Ring breathing                        | 7                |
| 1043                                                 | Carbohydrates III     | C-O stretching                        | 8                |
| 1240                                                 | Amide III of proteins | 40% C-N stretch stretch, 30% N-H bend | 9                |
| 1320                                                 | Lipid I               | C-H deformation                       | 10               |
| 1450                                                 | Lipid II              | CH <sub>2</sub> deformation           | 10               |
| 1574                                                 | Amide II of proteins  | 60% N-H bend and 40% C-N stretch      | 9                |
| 1662                                                 | Amide I of proteins   | 80% C=O stretch                       | 9                |



**Table S3.** Confusion matrix and performance evaluation of the kNN classification model classifying 116 STM-LT2 spectra, 152 STM-D23580 spectra and 125 ST-Ty2 spectra.

|                               |             | <b>Actual Class</b> |              |              |
|-------------------------------|-------------|---------------------|--------------|--------------|
|                               |             | STM-LT2             | STM-D23580   | ST-Ty2       |
| <b>Predicted class</b>        | STM-LT2     | <b>106</b>          | 10           | 0            |
|                               | STM-D23580  | 10                  | <b>135</b>   | 3            |
|                               | ST-Ty2      | 0                   | 7            | <b>122</b>   |
| <b>Performance evaluation</b> | Sensitivity | <b>91.4%</b>        | <b>88.8%</b> | <b>97.6%</b> |
|                               | Accuracy    | <b>92.4%</b>        |              |              |

## Supporting Figures

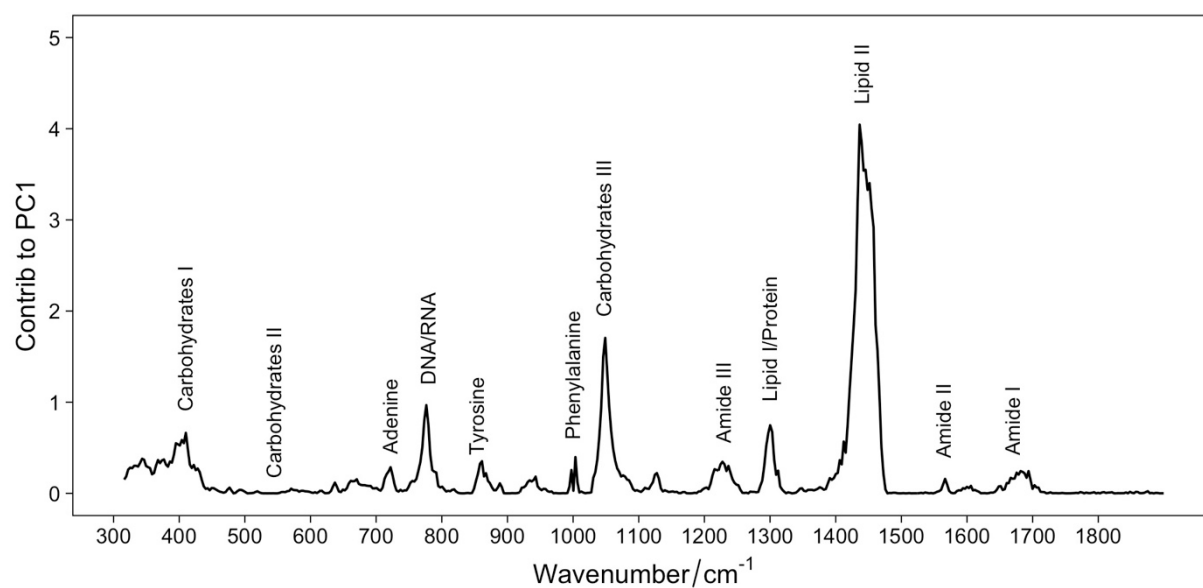

**Figure S1.** Loading plot of SCRS of STM-LT2, STM-D23580 and ST-Ty2, with Raman wavenumbers against their contributions to PC1 of the PCA. The labelled assignments are according to the wavenumbers in Figure 1A and Table S1. Other unlabelled bands include wavenumbers at around 630 (C-C twisting of aromatic compounds), 671 (ring breathing in DNA bases), 940 (C-C stretching of protein backbone) and 1125 cm<sup>-1</sup> (C-C stretching of proteins and lipids).

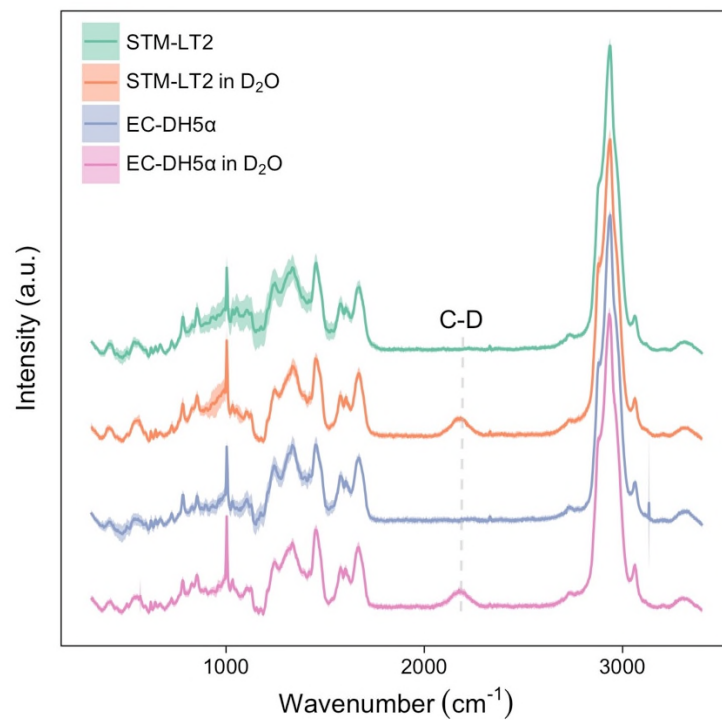

**Figure S2.** SCRS of STM-LT2 and *E. coli* DH5α (EC- DH5α). Bacterial cultures were grown overnight in LB broth in the presence of 35% D<sub>2</sub>O. A broad C-D band indicates incorporation of D during active metabolism. The shaded area represents standard deviation from 30 single-cell measurements.

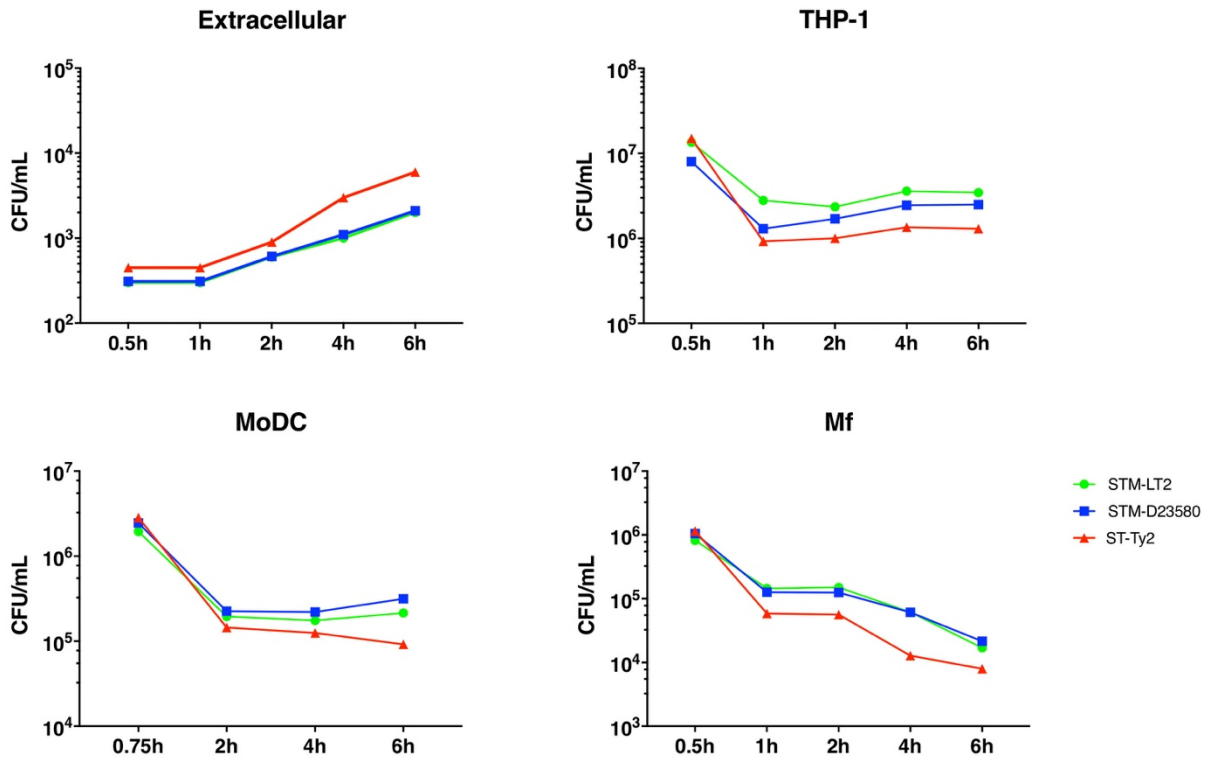

**Figure S3.** Number of recovered live *Salmonella*, expressed as CFU/mL during (A) extracellular growth of D-labelled bacteria in RPMI and intracellular growth of D-labelled bacteria in (B) THP-1, (C) Monocyte-derived Dendritic cell (MoDC) and (D) macrophages (Mf). An average of two experiments is shown.

Serovar ■ STM-LT2 ■ STM-D23580 ■ ST-Ty2

**A**

Quantification of biomolecules (a.u.)

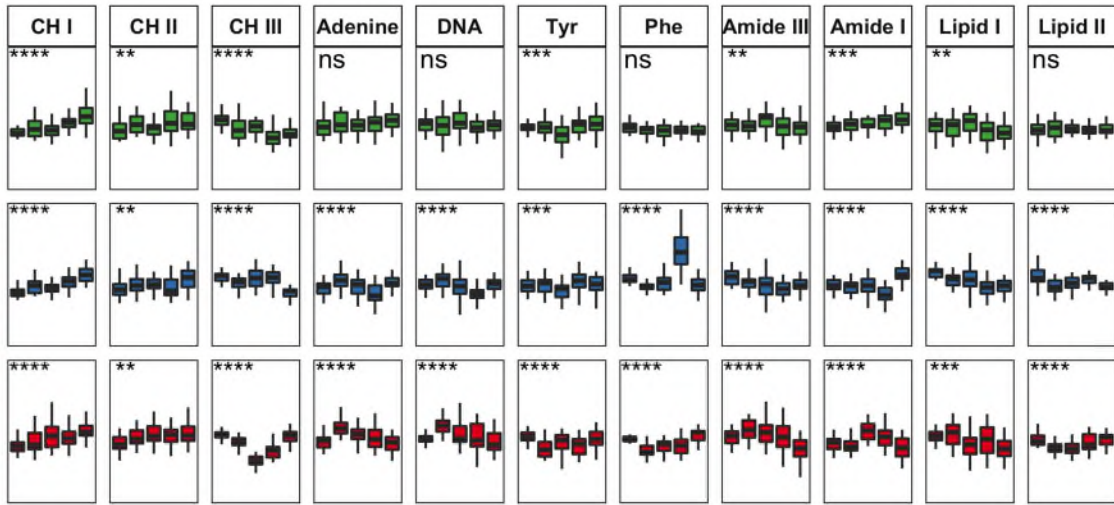

**B**

Quantification of biomolecules (a.u.)

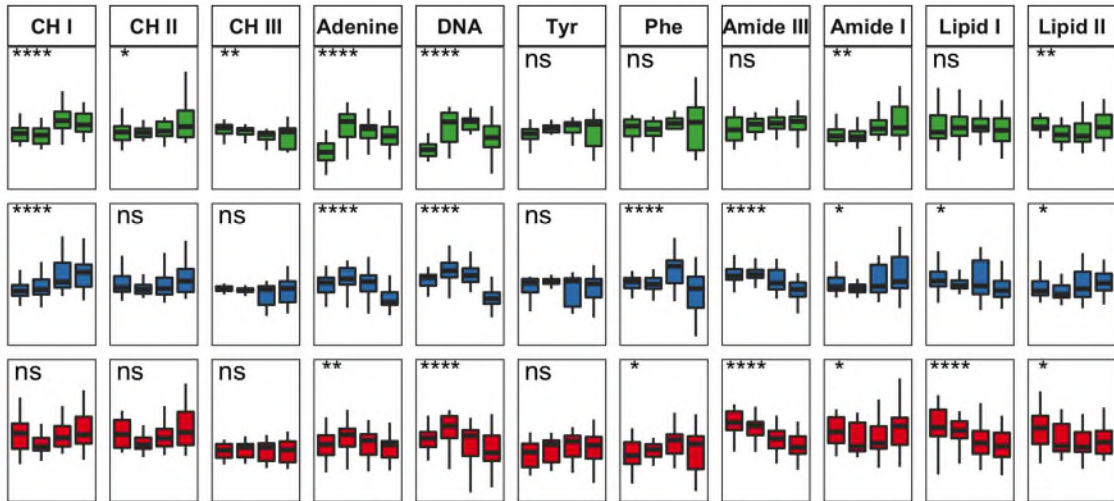

**C**

Quantification of biomolecules (a.u.)

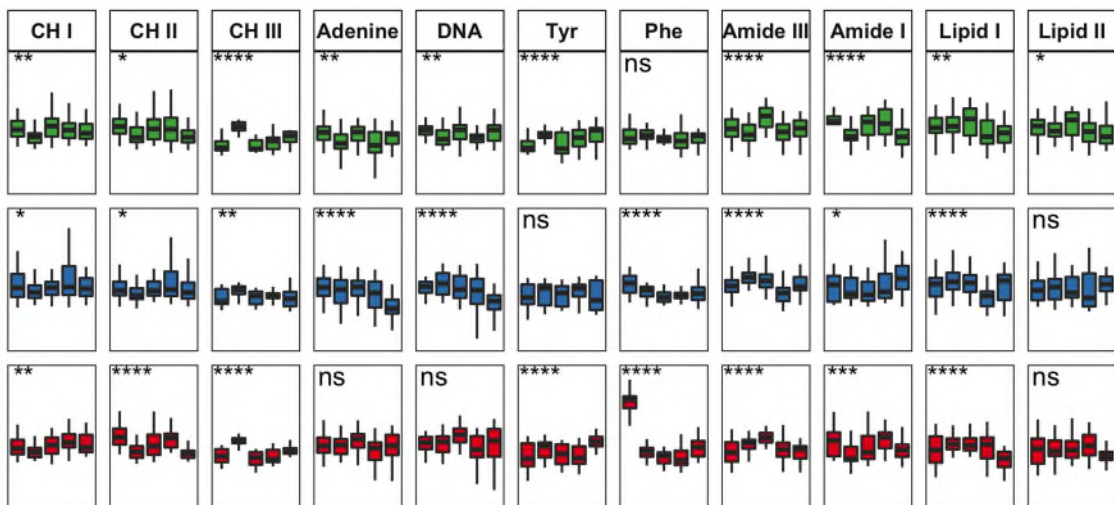

**Figure S4.** Complete Raman profiling of biomolecules in intracellular *Salmonella* inside (A) THP-1 cells, (B) MoDCs and (C) Mf, based on their single-cell Raman spectra.

Boxplots showing semi-quantification of selected biomolecules by integrating relevant Raman bands in fingerprint region of SCRS of STM-LT2, STM-D23580 and ST-Ty2 at different time point of infection in (A) THP-1 cells, (B) dendritic cells and (C) macrophages. Statistics was done by using one-way ANOVA with a global p-value to indicate general differences among time points (ns:  $p > 0.05$ ; \*:  $p < 0.05$ ; \*\*:  $p < 0.01$ ; \*\*\*:  $p < 0.001$ ; \*\*\*\*:  $p < 0.0001$ ).

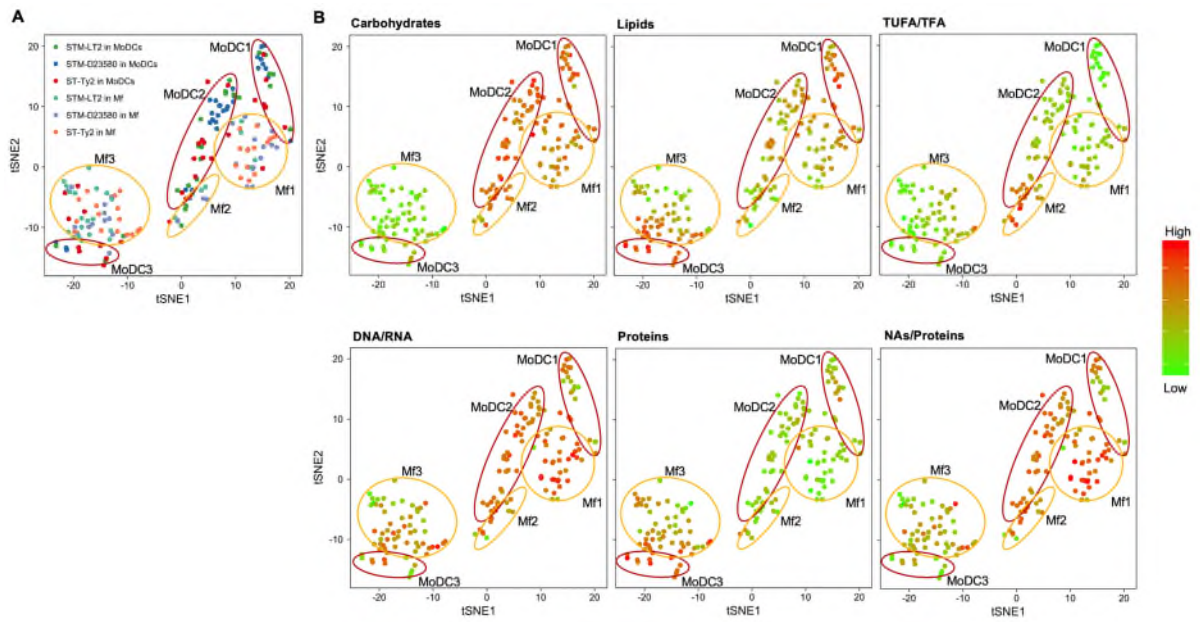

**Figure S5.** (A) A t-SNE plot of single cells (perplexity = 10) computed based on SCRS of STM-LT2, STM-D23580 and ST-Ty2 at 2 hr p.i. of MoDCs and Mf. Three bacterial subpopulations were clustered in MoDCs (MoDC1, MoDC2 and MoDC3) or in Mf (Mf1, Mf2 and Mf3). (B) t-SNE plots colored based on quantification of different biomolecules. The intensity gradient is mapped from green (low) to red (high).

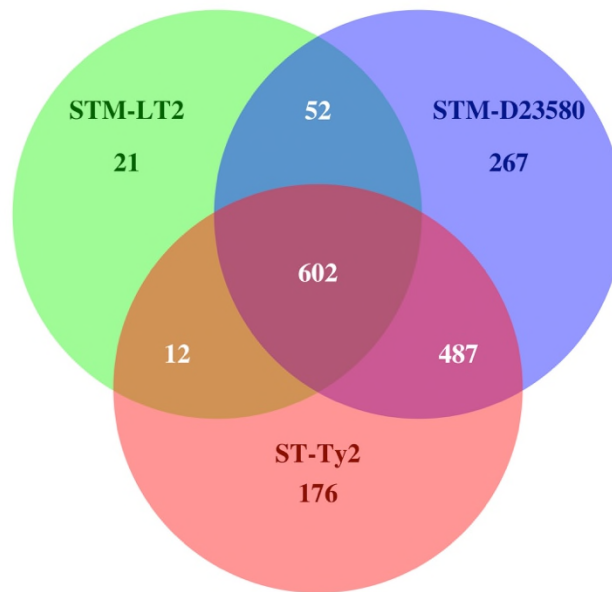

**Figure S6.** Venn diagram of proteins detected by LC in STM-LT2, STM-D23580 and ST-Ty2 during infection in human dendritic cells.



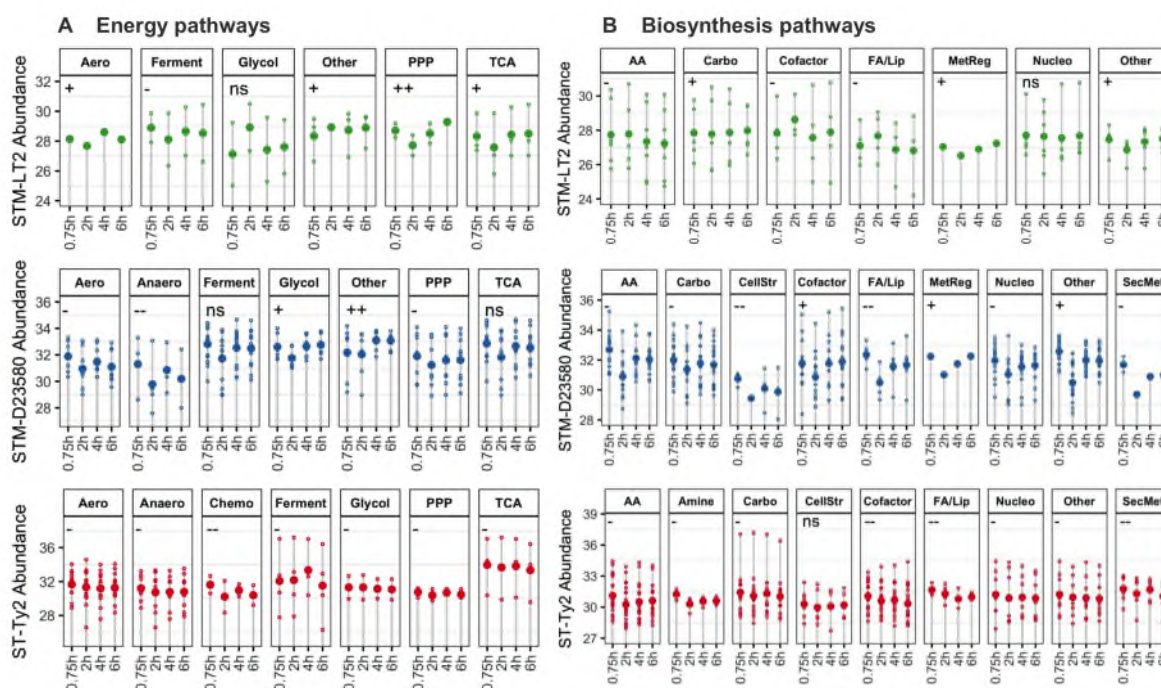

**Figure S7.** Dotplots of abundance of DEPs as log<sub>2</sub> of the LFQ related to (A) energy and (B) biosynthesis pathways in STM-LT2 (green), STM-D23580 (blue) and ST-Ty2 (red). The number of DEPs related to energy pathways is 65 in STM-LT2, 92 in STM-D23580 and 94 in ST-Ty2, respectively. The number of DEPs related to biosynthesis pathways is 44 in STM-LT2, 82 in STM-D23580 and 62 in ST-Ty2, respectively.

The large dot represents the average of all log<sub>2</sub> protein expression values belonging to a specific biosynthesis pathway at one time point. Each of the small dots represents a data value for an individual protein within the pathway. Time-wise changes were calculated as linear regression slopes and represented as “++” and “+” being upregulated ( $>10^{-1}$  and  $1>0^{-2}$ ), “--” and “-” being downregulated ( $<-10^{-1}$  and  $<-10^{-2}$ ), and “ns” being non-significant ( $<10^{-3}$ ) over time.

Abbreviations of the pathways are listed as follows: “AA” stands for “Amino Acid Biosynthesis”; “Amine” stands for “Amines and Polyamines Biosynthesis”; “Carbo” stands for “Carbohydrates Biosynthesis”; “CellStr” stands for “Cell Structures Biosynthesis”; “Cofactor” stands for “Cofactors, Prosthetic Groups, Electron Carriers Biosynthesis”; “FA/Lip” stands for “Fatty Acids and Lipids Biosynthesis”; “MetReg” stands for “Metabolic Regulators Biosynthesis”; “Nucleo” stands for “Nucleosides and Nucleotides Biosynthesis”; “Other” stands for “Other Biosynthesis”; “SecMet” stands “Secondary Metabolites Biosynthesis”.

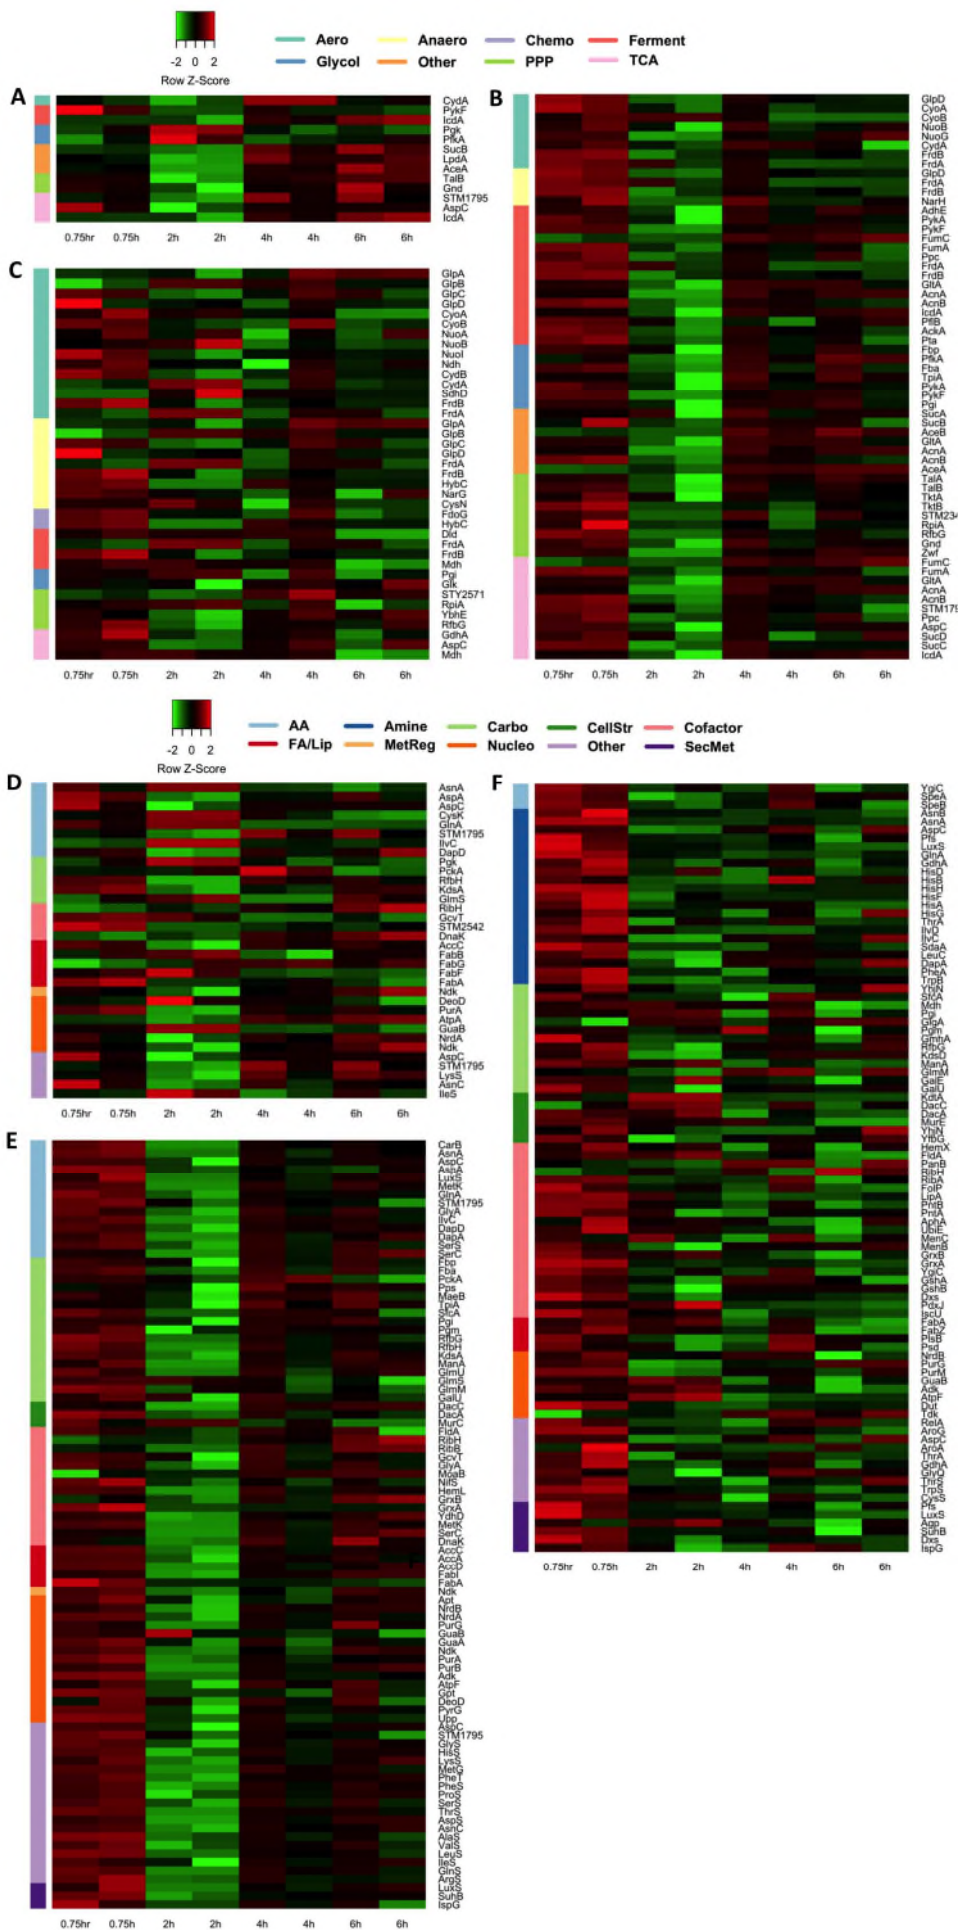

**Figure S8.** Heatmaps of row-normalized abundance of differentially expressed proteins (DEPs) related to energy pathways in (A) STM-LT2, (B) STM-D23580 and (C) ST-Ty2 or biosynthesis pathways in (D) STM-LT2, (E) STM-D23580 and (F) ST-Ty2. Color bars on the left present assignment of protein to one specific energy pathway and individual protein names are listed on the right.

Abbreviations of the pathways are listed as follows: “Aero” stands for “Aerobic Respiration”; “Anaero” stands for “Anaerobic Respiration”; “Chemo” stands for “Chemoautotrophic Energy Metabolism”; “Ferment” stands for “Fermentation”; “Glycol” stands for “Glycolysis”; “Other” stands for “Other Energy Pathways”; “PPP” stands for “Pentose Phosphate Pathway”; “TCA” stands for “The Citric Acid Cycle”; “AA” stands for “Amino Acid Biosynthesis”; “Amine” stands for “Amines and Polyamines Biosynthesis”; “Carbo” stands for “Carbohydrates Biosynthesis”; “CellStr” stands for “Cell Structures Biosynthesis”; “Cofactor” stands for “Cofactors, Prosthetic Groups, Electron Carriers Biosynthesis”; “FA/Lip” stands for “Fatty Acids and Lipids Biosynthesis”; “MetReg” stands for “Metabolic Regulators Biosynthesis”; “Nucleo” stands for “Nucleosides and Nucleotides Biosynthesis”; “Other” stands for “Other Biosynthesis”; “SecMet” stands for “Secondary Metabolites Biosynthesis”.

## SI References

- (1) Alakomi, H. L.; Skytta, E.; Saarela, M.; Mattila-Sandholm, T.; Latva-Kala, K.; Helander, I. M. *Applied and Environmental Microbiology* **2000**, *66*, 2001-2005.
- (2) Kollipara, L.; Zahedi, R. P. *Proteomics* **2013**, *13*, 941-944.
- (3) Góral, J.; Zichy, V. *Spectrochimica Acta Part A: Molecular Spectroscopy* **1990**, *46*, 253-275.
- (4) Maquelin, K.; Kirschner, C.; Choo-Smith, L. P.; van den Braak, N.; Endtz, H. P.; Naumann, D.; Puppels, G. J. *J Microbiol Methods* **2002**, *51*, 255-271.
- (5) De Gelder, J.; De Gussem, K.; Vandenaabeele, P.; Moens, L. *Journal of Raman Spectroscopy* **2007**, *38*, 1133-1147.
- (6) Ruiz-Chica, A. J.; Medina, M. A.; Sánchez-Jiménez, F.; Ramírez, F. J. *Journal of Raman Spectroscopy* **2004**, *35*, 93-100.
- (7) Hernández, B.; Pflüger, F.; Kruglik, S. G.; Ghomi, M. *Journal of Raman Spectroscopy* **2013**, *44*, 827-833.
- (8) Xu, J.; Webb, I.; Poole, P.; Huang, W. E. *Anal Chem* **2017**, *89*, 6336-6340.
- (9) Rygula, A.; Majzner, K.; Marzec, K. M.; Kaczor, A.; Pilarczyk, M.; Baranska, M. *Journal of Raman Spectroscopy* **2013**, *44*, 1061-1076.
- (10) Czamara, K.; Majzner, K.; Pacia, M. Z.; Kochan, K.; Kaczor, A.; Baranska, M. *Journal of Raman Spectroscopy* **2015**, *46*, 4-20.
